# Supplementary material
Source: PubMed Central journal article supplement (PMC4159674)

SERCA2a

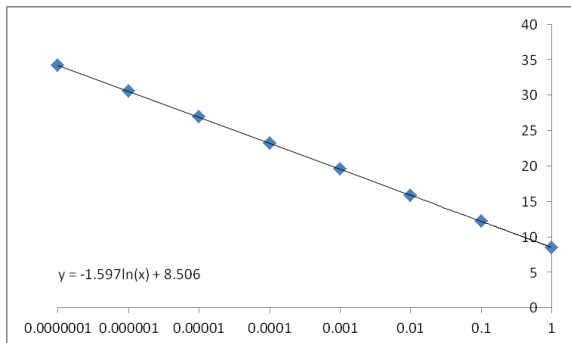

SERCA3a

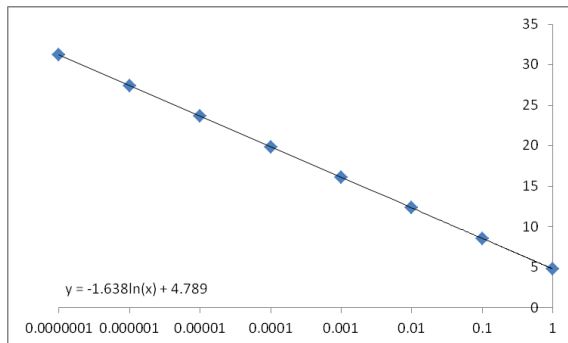

SERCA2b

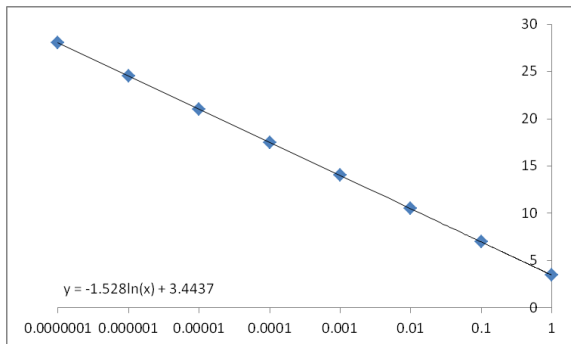

SERCA3b

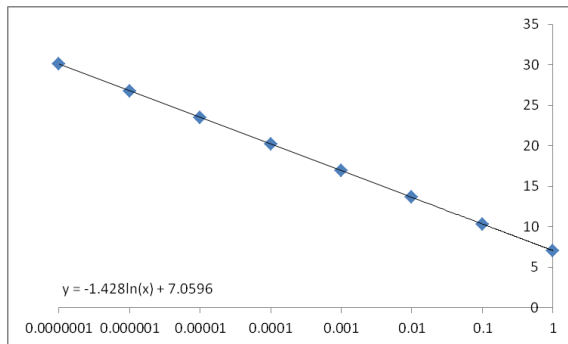

SERCA3c

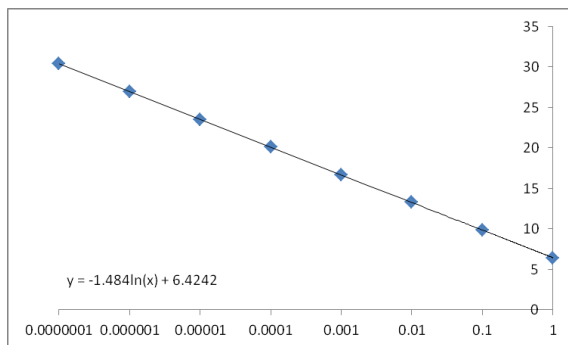

Figure 1S

Supplement: NIHMS620013-supplement-01.pdf [file NIHMS620013-supplement-01.pdf]
